# Supplementary material
Source: PubMed Central journal article supplement (PMC3815317)
Supplement: mbt0002-0613-SD1.pdf [file mbt0002-0613-SD1.pdf]

## Supporting Information

Dynamic of active microorganisms inhabiting a bioleaching industrial heap of  
low-grade copper sulfide ore monitored by Real-time PCR and  
oligonucleotide Prokaryotic Acidophile Microarray (PAM)

**Francisco Remonsellez<sup>1,2</sup>, Felipe Galleguillos<sup>1</sup>, Mercedes Moreno-Paz<sup>3</sup>, Víctor  
Parro<sup>3\*</sup>, Mauricio Acosta<sup>1</sup>, and Cecilia Demergasso<sup>1,4\*\*</sup>.**

<sup>1</sup>Biotechnology Center, Universidad Católica del Norte, Antofagasta, Chile.

<sup>2</sup>Biotecnor Ltda., Antofagasta, Chile.

<sup>3</sup>Laboratory of Molecular Ecology, Centro de Astrobiología (CSIC-INTA), Torrejón de Ardoz, Madrid, España.

<sup>4</sup>Centro de Investigación Científica y Tecnológica para la Minería, Antofagasta, Chile.

## Supporting Figures

**Supporting Figure S1.** Phylogenetic tree based on comparative analysis of 16S rRNA gene sequences representatives of *At. ferrooxidans* type strains. Sequences were aligned using the alignment tool of ARB program (Strunk and Ludwig, 1995). Phylogenetic tree was generated using the maximum-parsimony algorithm in the ARB program. The bar indicates a 1 % estimated sequence divergence. The sequences obtained in this study are indicated in bold.

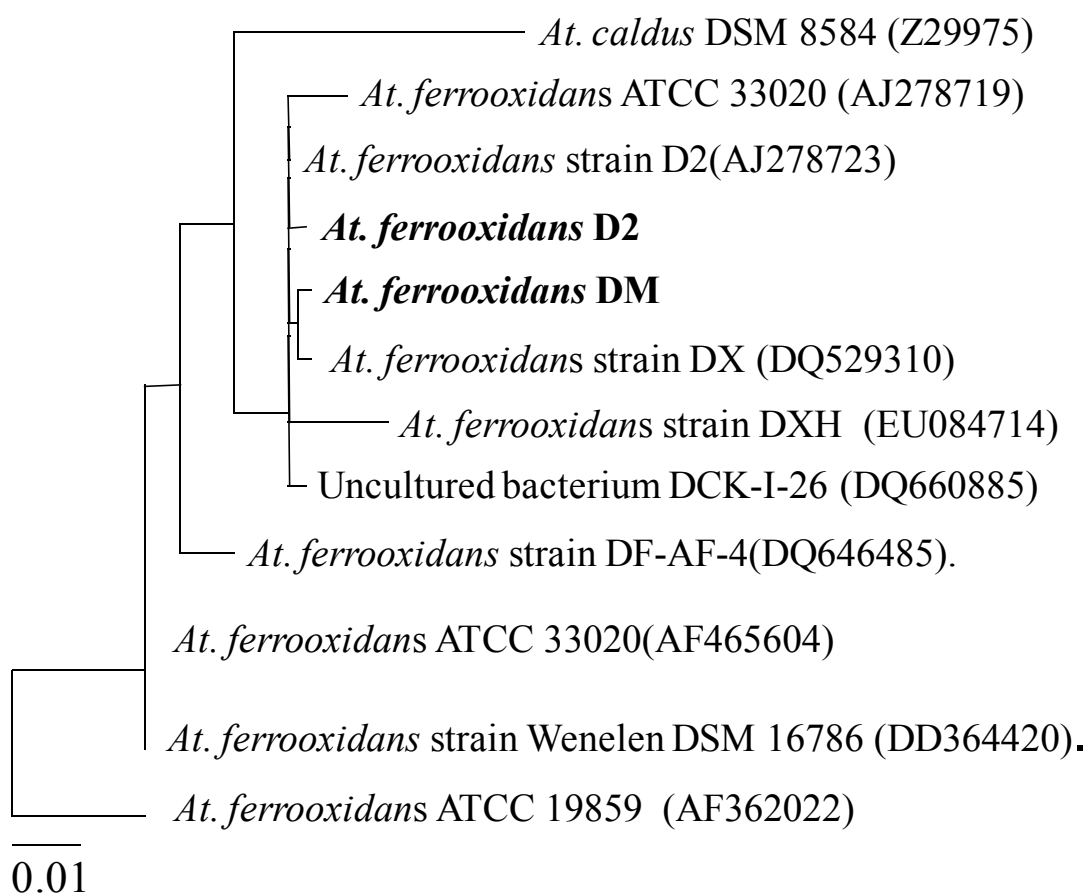

**Supporting Figure S2.** Phylogenetic tree based on comparative analysis of 16S rRNA gene sequences representatives of *Leptospirillum* strains. Sequences were aligned using the alignment tool of ARB program (Strunk and Ludwig, 1995). Phylogenetic tree was generated using the maximum-parsimony algorithm in the ARB program. The bar indicates a 1 % estimated sequence divergence. The sequences obtained in this study are indicated in bold.

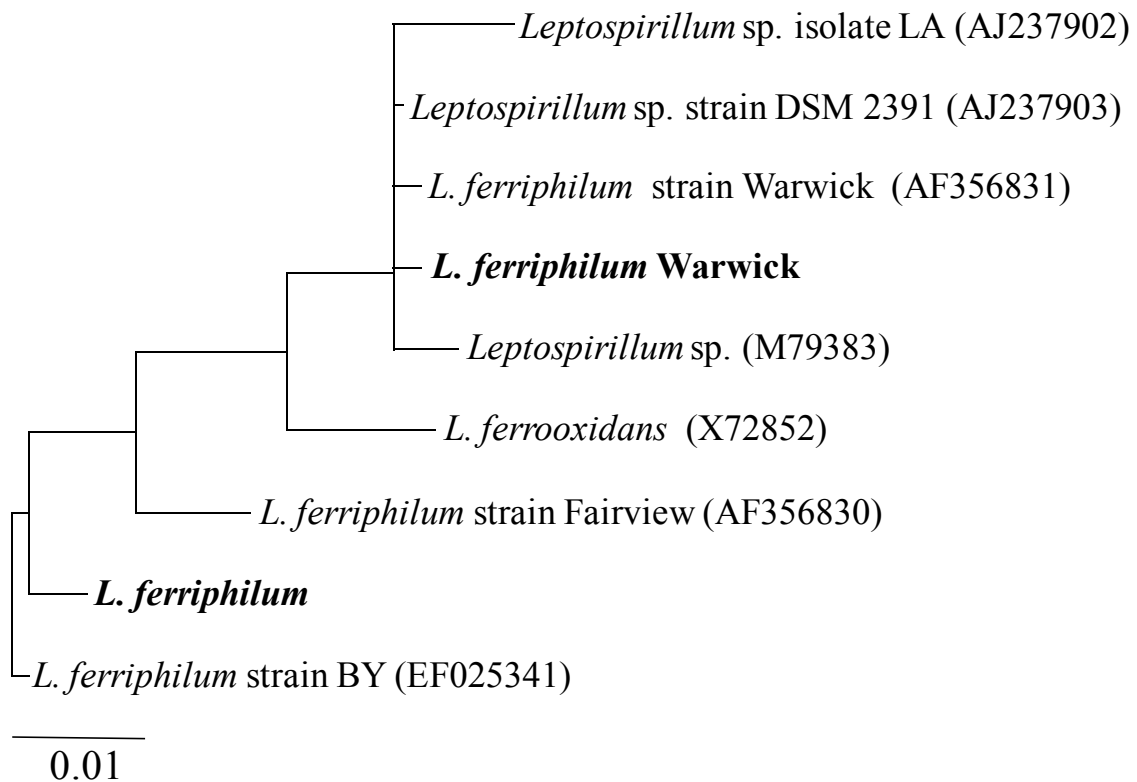

**Supporting Figure S3.** Assaying total industrial heap RNA with a Prokaryotic acidophile microarray (PAM). (A) Examples of two PAM images corresponding to hybridization with total RNA from strips S10 and S5. The yellow rectangles point out the universal probes UNI1392, Y2R and EU338 for a better orientation. (B) The name and position of each probe was described by Garrido *et al.* (2008). Different coloured rectangles indicate some relevant probes: universal (*yellow*), those showing higher intensity in earlier (S10, in *green*) or older (S5, *red*) stages of the industrial process. (C) Histograms showing the average relative signal intensity of two different hybridizations for the different analyzed strips, from younger to older ones (S10-S8-S5). BACT, Bacteria; Alpha, Alphaproteobacteria; HGC, High GC containing bacteria; LGC, Low GC containing bacteria; Acidob., Acidobacterium; Beta, Betaproteobacteria.

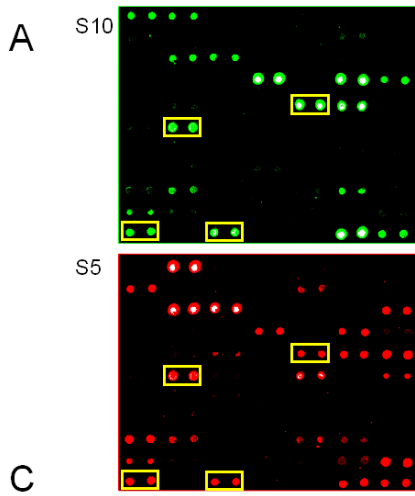

**B**

|          |            |          |              |            |          |                   |
|----------|------------|----------|--------------|------------|----------|-------------------|
| ABLK2    | THI187     | Cren 537 | MBGB 280     | MBGB 335   | MBGB 380 | MBGB 525          |
| SUL228   | TM1G 138   | TM2G 138 | GALTS 0084   | WJ2        | NITROSO  | ABLK 1            |
| ACT465d  | F655       | F581     | F1252        | ACD 840    | FRM0732  | HGC 236           |
| BET42a   | E.coli DNA | Lfe DNA  | TF539        | THC642     | ACT465b  | ACT465c           |
| MEB859   | ICDH       | EUK 502  | CASEI F      | Y2R        | GAM42a   | GRAMGC 1901 (23s) |
| Nonsense | UNI1392    | NON 338  | IAf          | 1100Ar     | TMP 654  | FER 656           |
| Type 2b  | NON338     | NON 338  | SREDBA C 647 | NON338     | NON338   | NON338            |
| DSP648   | DFMI 229   | Mb1007r  | NON338       | Mm1007r    | Ms 1020r | Mm 835            |
| LEP154   | ALF968     | ACD638   | ACM1160      | LGC354a    | LGC354b  | LGC 354c          |
| ATT985   | Nonsense   | NON338   | LCA 206      | LEP439     | LEP432   | LCB 206           |
| UNI1392  | NON338     | EUB 338  | EUB 338II    | EUB 338III | THI01    | ACT465a           |

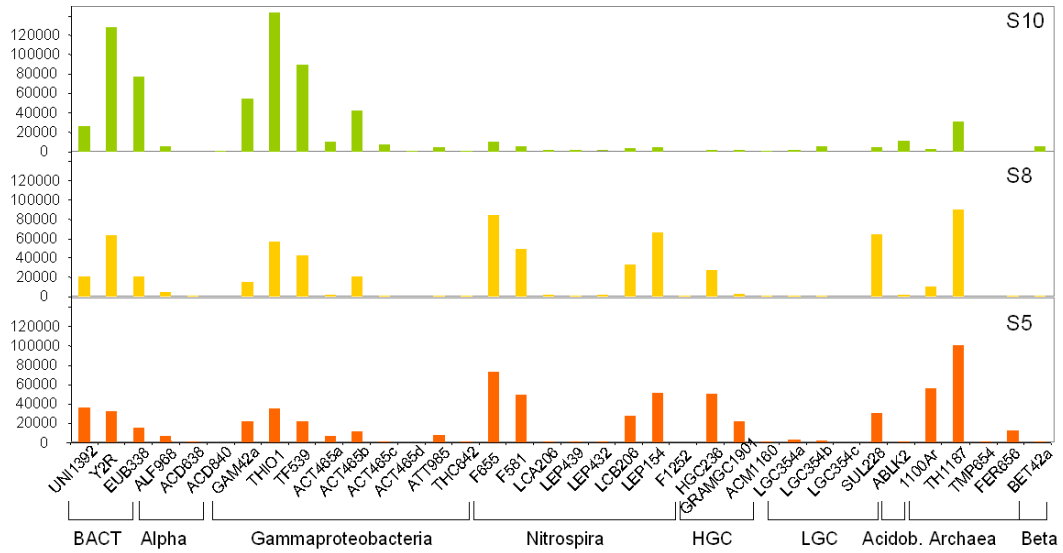

## Supporting Table S1

Table S1. Acidophilic microorganisms identified in heap processes.

| Heap,<br>Location                                       | Microorganisms identified                                                                                                                                                                                                           | Reference                                          |
|---------------------------------------------------------|-------------------------------------------------------------------------------------------------------------------------------------------------------------------------------------------------------------------------------------|----------------------------------------------------|
| Cultures from Chalcopyrite overburden,<br>Australia     | <i>At. ferrooxidans</i> , <i>At. thiooxidans</i> ,<br><i>Acidiphilium cryptum</i>                                                                                                                                                   | Goebel and Stackebrandt, 1994                      |
| Cultures and solutions from Lo Aguirre copper,<br>Chile | <i>At. ferrooxidans</i> , <i>At. thiooxidans</i> , <i>L. ferrooxidans</i>                                                                                                                                                           | Espejo and Romero, 1997                            |
| Copper sulfide/oxide,<br>SW USA                         | <i>Acidithiobacillus</i> spp., <i>L. ferrooxidans</i> , <i>Acidiphilium</i> spp.,<br>' <i>Ferrimicrobium acidiphilum</i> '                                                                                                          | Bruhn <i>et al.</i> , 1999                         |
| Run-of-mine test heap,<br>Chile                         | <i>At. ferrooxidans</i> , <i>L. ferriphilum</i> ,<br>Firmicutes, <i>F. acidiphilum</i> ,<br>Crenarchaeotes                                                                                                                          | Demergasso <i>et al.</i> , 2005                    |
| Chalcocite heap,<br>Australia                           | <i>L. ferriphilum</i> , <i>Acidithiobacillus caldus</i> , ' <i>Ferroplasma cyprexacervatum</i> '                                                                                                                                    | Hawkes <i>et al.</i> , 2006                        |
| Tong Shankou copper,<br>China                           | Betaproteobacteria (uncultured Tui3-12 and <i>Acidivorax</i> sp.), <i>At. ferrooxidans</i> , <i>Acidiphilium</i> sp.,<br><i>Leptospirillum</i> species, novel Firmicutes, <i>Thermoplasma</i> genus,<br><i>Ferroplasma</i> genus    | Xie <i>et al.</i> , 2007                           |
| Dongxiang copper mine,<br>China                         | <i>L. ferriphilum</i> , <i>Leptospirillum</i> sp., <i>At. ferrooxidans</i> , <i>A. albertensis</i> ,<br>uncultured bacterium, <i>F. cyprexacervatum</i> , <i>F. acidiphilum</i> ,<br>uncultured archaeon, <i>Thermoplasma</i> group | He <i>et al.</i> , 2008; Xiao <i>et al.</i> , 2008 |
| Run-of-mine industrial heap,<br>Chile                   | <i>At. ferrooxidans</i> , <i>At. thiooxidans</i> , <i>L. ferriphilum</i> , <i>Acidiphilium</i> -like,<br>Firmicutes, <i>Ab. disulfidooxidans</i> , <i>F. acidiphilum</i> , <i>Acidobacterium</i> spp.,<br><i>Sulfobacillus</i> spp. | This study                                         |

## **Supporting Experimental Procedures**

### *RNA amplification and cDNA labeling*

For microarray analysis, the quality of RNA was checked using the Bioanalyzer 2100 (Agilent technologies). The total RNA of strips S5, S8 and S10 in August 2007 was amplified through a method based on T7 RNA polymerase linear amplification as described previously (Moreno-Paz and Parro, 2006), but using all the reagents and components of the Message Amp II aRNA kit (Ambion). After a second amplification round the sense RNA (2  $\mu\text{g}$ ) was labeled with the CyScribe first-strand cDNA labeling kit (Amersham Biosciences) with Cy5 or Cy3-dUTP following the supplier's recommendations.

### *Microarray hybridization and analysis*

The Prokaryotic Acidophile Microarray (PAM) was constructed with oligonucleotide probes obtained from the literature and printed with Microgrid II arrayer (BioRobotics, Genomic Solutions) as described previously (Garrido et al., 2008). Microarrays were pre-hybridized with 20  $\mu\text{L}$  of 5 $\times$  SSC, 0.1 % SDS, 0.1 mg mL<sup>-1</sup> of herring sperm DNA, and 1 % BSA at 42 °C during 30-40 min. Slides were washed in distilled water, submerged in isopropanol before being dried by centrifugation. The hybridization was carried out at 50 °C during 12 hours and washed at room temperature as described (Garrido et al., 2008). Scanning was performed in a GenePix 4000B scanner (Genomic Solutions). Images were analyzed and spots signal was quantified using Genepix Pro 6.0 software (Genomic

Solution). Those spot having intensities 3-4 times over background were considered positive.



## Supporting References

- Bruhn, D. F., Thompson, D. N. and Naoh, K. S. (1999) Microbial ecology assessment of a mixed copper oxide/sulfide dump leach operation. In *Biohydrometallurgy and the Environment*. Toward the Mining of the 21st Century, Process Metallurgy 9A, pp. 799–808. Amils, R. and Ballester, A. (eds.). Elsevier Amsterdam.
- Demergasso, C. S., Galleguillos, P. A., Escudero, L. V., Zepeda, V. J., Castillo, D. and Casamayor, E. O. (2005) Molecular characterization of microbial populations in a low-grade copper ore bioleaching test heap. *Hydrometallurgy* **80**: 241-253.
- Espejo, R. T. and Romero, J. (1997) Bacterial community in copper sulfide ores inoculated and leached with solution from a commercial-scale copper leaching plant. *Appl Environ Microbiol* **63**: 1344-1348.
- Garrido, P., González-Toril, E., García-Moyano, A., Moreno-Paz, M., Amils, R. and Parro, V. (2008) An oligonucleotide prokaryotic acidophile microarray (PAM): its validation and its use to monitor seasonal variations in extreme acidic environments with total environmental RNA. *Environ Microbiol* **10**: 836-850.
- Goebel, B. M. and Stackebrandt, E. (1994) Cultural and phylogenetic analysis of mixed microbial populations found in natural and commercial bioleaching environments. *Appl Environ Microbiol* **60**: 1614-1621.
- Hawkes, R. B., Franzmann, P. D. and Plumb, J. J. (2006) Moderate thermophiles including “*Ferroplasma cyprexacervatum*” sp. nov., dominate an industrial scale chalcocite heap bioleaching operation. *Hydrometallurgy* **83**: 229–236.

- He, Z., Xiao, S., Xie, X. and Hu, Y. (2008) Microbial diversity in acid mineral bioleaching systems of Dongxiang copper mine and Yinshan lead-zinc mine. *Extremophiles* **12**: 225-234.
- Moreno-Paz, M. and Parro, V. (2006) Amplification of low quantity bacterial RNA for microarray studies: time-course analysis of *Leptospirillum ferrooxidans* under nitrogen-fixing conditions. *Environ Microbiol* **8**: 1064-1073.
- Strunk, O. and Ludwig, W. (1995) ARB-a software environment for sequence data. Department of Microbiology, Technical University of Munich, Munich.
- Xiao, S., Xie, X., Liu, J., He, Z. and Hu, Y. (2008) Composition and structures of archaeal communities in acid mineral bioleaching system of Dongxiang Copper Mine and Yinshan Lead-Zinc Mine, China. *Curr Microbiol* **57**: 239-244.
- Xie, X., Xiao, S., He, Z., Liu, J. and Qiu, G. (2007) Microbial populations in acid mineral bioleaching system of Tong Shankou Copper Mine, China. *J Appl Microbiol* **103**: 1227-1238.
